# Supplementary material
Source: Springer Nature journal article supplement (https://www.springermedizin.de/resource/supplementary/12916_2007_154_MOESM8_ESM.pdf/9599280)
Supplement: MOESM8 [file 9599280]

## Experiment A

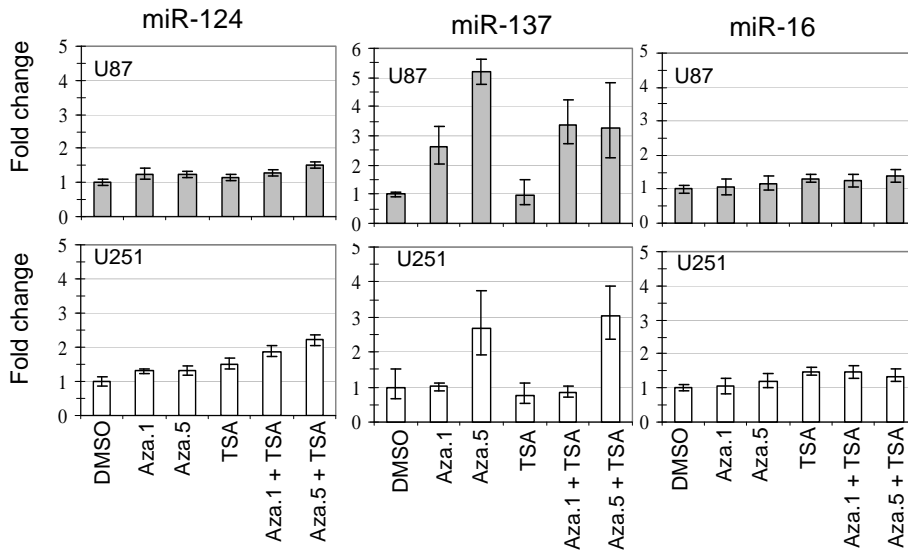

## Experiment B

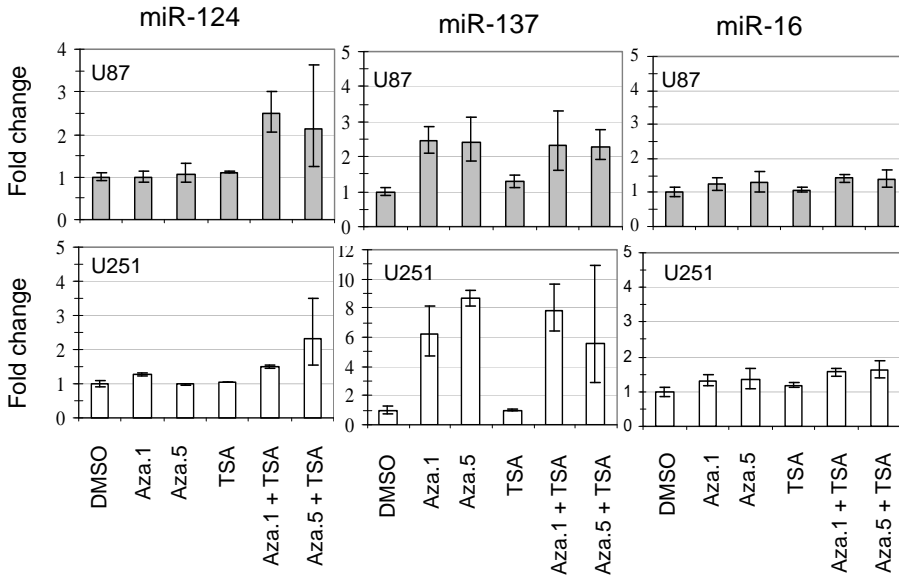

**Additional file 8 (Supplementary figure 4). miR expression in GBM cell lines following treatment with DNA demethylating and deacetylating agents.** miR expression in GBM cell lines (U87 and U251) treated with 5-aza-dC at 1 $\mu$ M (Aza.1) or 5 $\mu$ M (Aza.5) alone, TSA (100 ng/ml) alone, or combinations of both agents. miR expression was measured relative to let-7a , and normalized to vehicle control (DMSO). Error bars represent SD of triplicate PCR reactions from a single experimental set. Results from two independent experiments are shown.
